# Supplementary material for: Membrane Sphingolipids Regulate the Fitness and Antifungal Protein Susceptibility of Neurospora crassa
Source: Front Microbiol. 2019 Apr 11;10:605. doi: 10.3389/fmicb.2019.00605 (PMC6471014; doi:10.3389/fmicb.2019.00605)
Supplement: Supplementary file 1 [file Table_1.xlsx]

## Sheet: Supplement Lipid analysis quant
Supplementary Table 1. Lipid quantification - raw data
row.identity	wt_a_1	wt_a_2	wt_a_3	wt_a_4	wt_a_5	mean	sd	row.identity	wt_A_1	wt_A_3	wt_A_4	wt_A_5	mean	sd	row.identity	lac_1	lac_2	lac_3	lac_4	lac_5	mean	sd	row.identity	gcs_1	gcs_2	gcs_3	gcs_4	gcs_5	mean	sd	row.identity	smt_1	smt_2	smt_3	smt_4	smt_5	mean	sd	row.identity	des_2_1	des_2_2	des_2_3	des_2_4	des_2_5	mean	sd	row.identity	des_1_1	des_1_2
CL:68:3	84.0155	14.4307	34.9362	17.6688	48.4042	39.8911	28.2225	CL:68:3	97.0088	18.5474	39.5727	18.2561	43.3462	37.1412	CL:68:3	14.6177	31.7437	9.24363	13.6106	27.2546	19.294	9.66364	CL:68:3	5.76992	24.4947	8.51506	3.78552	10.1736	10.5478	8.17535	CL:68:3	12.5272	9.69105	21.2927	52.563	26.6306	24.5409	17.0661	CL:68:3	62.091	11.6011	91.41	63.2104	33.8776	52.438	30.5785	CL:68:3	3.7462	15.6444
CL:68:4	329.844	110.103	202.884	100.771	244.988	197.718	95.9083	CL:68:4	346.014	98.3479	190.648	84.9542	179.991	120.243	CL:68:4	119.852	193.555	79.1976	113.048	150.964	131.324	43.1311	CL:68:4	27.4487	92.6918	53.794	26.5381	46.5702	49.4086	26.9538	CL:68:4	68.8635	48.5214	109.748	304.543	205.97	147.529	106.638	CL:68:4	490.313	128.321	564.577	573.144	269.862	405.243	197.376	CL:68:4	20.0856	119.548
CL:68:5	55.6182	65.4654	47.5437	26.1426	44.933	47.9406	14.581	CL:68:5	72.0098	34.2036	40.931	19.4469	41.6478	22.1409	CL:68:5	15.608	70.552	11.3042	17.8063	55.4997	34.1541	26.9897	CL:68:5	18.879	47.7307	27.1044	9.69533	20.6254	24.807	14.2457	CL:68:5	12.8578	9.94891	12.0821	53.6253	31.2029	23.9434	18.6624	CL:68:5	54.1232	18.2046	106.825	81.7231	43.5972	60.8946	34.3179	CL:68:5	9.96896	18.4224
CL:68:6	4.4451	12.645	5.79147	4.37685	4.65197	6.38207	3.54748	CL:68:6	6.08482	6.74588	4.34313	2.87664	5.01262	1.7478	CL:68:6	1.46259	10.0977	1.13892	1.91613	8.5226	4.62758	4.31951	CL:68:6	5.17696	9.9627	7.71588	2.11216	4.48613	5.89077	3.02787	CL:68:6	1.29068	0.993947	1.00436	5.13737	3.96839	2.47895	1.94147	CL:68:6	5.57164	1.81488	14.8127	8.85303	6.40066	7.49057	4.81022	CL:68:6	1.62871	2.53824
CL:68:7	0.125867	0.316132	0.268037	0.197286	0.174026	0.21627	0.075779	CL:68:7	0.136905	0.207496	0.0979974	0.0781505	0.130137	0.0570549	CL:68:7	0	0.174978	0	0	0.161156	0.0672268	0.0921837	CL:68:7	0.0733391	0.204551	0.0981245	0	0.0107143	0.0773458	0.0822361	CL:68:7	0.0738256	0.0507634	0.0530435	0.202925	0.15913	0.107937	0.0690818	CL:68:7	0.110855	0	0	0.407982	0.168728	0.137513	0.167823	CL:68:7	0.0476513	0.0598186
CL:70:4	46.3212	22.7464	27.5447	16.8858	31.2028	28.9402	11.1	CL:70:4	57.5966	17.5421	25.3917	11.8735	28.101	20.43	CL:70:4	14.2105	44.3536	9.03052	15.0633	31.6639	22.8644	14.7169	CL:70:4	13.7568	38.6581	18.3311	7.95094	15.9358	18.9266	11.6814	CL:70:4	8.95166	8.24239	13.0423	44.5149	23.988	19.7478	15.2092	CL:70:4	45.4669	10.9293	99.9838	70.2339	26.4225	50.6073	35.3868	CL:70:4	6.27012	27.578
CL:70:5	242.956	92.739	164.195	90.3576	185.291	155.108	64.7947	CL:70:5	263.146	95.9024	144.416	65.7377	142.301	86.8383	CL:70:5	79.4336	195.832	49.0039	78.1231	158.038	112.086	61.8952	CL:70:5	55.5819	146.506	87.6081	43.8986	76.1685	81.9526	39.9253	CL:70:5	44.2632	32.0932	58.9602	235.897	138.462	101.935	85.631	CL:70:5	291.139	91.44	507.448	371.114	197.298	291.688	159.585	CL:70:5	26.0172	146.997
CL:70:6	596.741	247.765	459.186	318.052	495.034	423.356	140.005	CL:70:6	600.853	270.451	362.141	201.264	358.677	174.379	CL:70:6	350.577	561.387	247.822	327.715	453.05	388.11	121.428	CL:70:6	141.519	365.609	265.24	144.895	196.233	222.699	94.3093	CL:70:6	201.306	110.889	187.35	630.932	467.957	319.687	220.217	CL:70:6	1112.89	414.847	1451.13	1390.41	706.467	1015.15	446.123	CL:70:6	75.6093	447.902
CL:70:7	151.014	134.522	155.222	102.238	150.401	138.679	21.8431	CL:70:7	165.463	121.971	103.211	58.4845	112.283	44.3418	CL:70:7	37.0002	138.943	21.4966	55.5472	119.771	74.5517	51.9066	CL:70:7	60.0126	135.499	113.388	36.1643	78.6342	84.7395	40.0171	CL:70:7	28.9898	14.4532	21.4653	175.155	138.312	75.675	75.3092	CL:70:7	159.558	48.0183	371.367	277.369	144.497	200.162	125.665	CL:70:7	11.5716	57.4029
CL:70:8	11.3446	18.2569	17.1422	12.5708	14.6868	14.8003	2.9308	CL:70:8	10.0152	15.8993	7.78746	6.01546	9.92935	4.30324	CL:70:8	1.70521	14.8909	0.907301	2.50089	12.5073	6.50231	6.64747	CL:70:8	13.5673	23.8422	19.7141	5.66768	10.8558	14.7294	7.18261	CL:70:8	3.40186	1.52369	1.81551	13.7379	12.3955	6.5749	5.98797	CL:70:8	8.67103	3.13667	33.9128	13.5453	11.249	14.1029	11.733	CL:70:8	1.67702	3.67301
CL:70:9	0.640535	0.960131	1.25058	1.01285	0.917486	0.956316	0.218533	CL:70:9	0.406217	0.927814	0.415102	0.351457	0.525147	0.269915	CL:70:9	0.00344195	0.617274	0	0.0366339	0.692946	0.270059	0.352808	CL:70:9	1.04894	1.21403	1.80071	0.423435	0.789878	1.0554	0.512487	CL:70:9	0.211599	0.0880964	0.122072	0.782642	0.652196	0.371321	0.322462	CL:70:9	0.443113	0	1.54834	0.451133	0.68607	0.625731	0.572324	CL:70:9	0.100935	0.0927494
CL:72:10	41.5334	35.3651	56.9513	45.3881	54.6307	46.7737	9.01182	CL:72:10	27.4042	46.7548	25.1071	16.8062	29.0181	12.6705	CL:72:10	5.41036	37.2723	1.97432	8.54355	38.7464	18.3894	18.0681	CL:72:10	45.5294	78.6205	57.608	22.9355	44.8949	49.9177	20.344	CL:72:10	10.8542	3.61857	4.20118	44.1845	38.7471	20.3211	19.605	CL:72:10	29.9737	9.71782	114.208	40.0553	40.5743	46.9058	39.643	CL:72:10	2.98655	10.644
CL:72:11	1.7361	2.27995	3.449	3.57147	3.00659	2.80862	0.784383	CL:72:11	1.06677	2.73214	1.00596	1.12152	1.4816	0.835027	CL:72:11	0.0481052	1.33752	0	0.134034	1.64989	0.633909	0.794065	CL:72:11	3.31788	3.33244	5.54323	1.60503	2.9631	3.35234	1.41476	CL:72:11	0.756393	0.259802	0.283548	2.49812	2.72198	1.30397	1.21121	CL:72:11	0.799234	0	3.94496	0.674601	1.74699	1.43316	1.53614	CL:72:11	0.298002	0.219074
CL:72:5	7.92914	3.98545	5.12932	3.27157	6.01638	5.26637	1.82288	CL:72:5	12.4885	4.98149	5.15217	2.4326	6.26368	4.33223	CL:72:5	2.77598	12.4399	1.68991	2.70655	8.13624	5.54971	4.60543	CL:72:5	4.98929	11.7515	4.62667	2.18806	4.28119	5.56734	3.62411	CL:72:5	1.07114	1.23176	1.77904	7.39207	1.94832	2.68447	2.65689	CL:72:5	7.36317	1.75415	19.9121	12.1361	5.34953	9.30301	7.01707	CL:72:5	1.86032	8.16796
CL:72:6	73.1616	28.6695	52.7583	31.7628	63.4726	49.965	19.4497	CL:72:6	85.6143	38.442	44.1681	23.2828	47.8768	26.6568	CL:72:6	27.7865	95.2773	16.9937	29.8668	70.2459	48.0341	33.2746	CL:72:6	37.1614	93.0629	43.3871	26.7162	45.4885	49.1632	25.6025	CL:72:6	13.2223	8.93013	13.7276	70.9161	32.1071	27.7806	25.7107	CL:72:6	101.56	34.3663	221.262	157.155	66.6683	116.202	74.2962	CL:72:6	10.491	91.4686
CL:72:7	208.988	74.2345	177.974	121.688	180.807	152.738	54.1194	CL:72:7	265.313	144.842	154.876	68.9602	158.498	80.8828	CL:72:7	82.5723	135.407	40.286	91.8516	121.887	94.4007	37.1207	CL:72:7	79.154	157.71	123.988	71.9806	86.8065	103.928	36.1333	CL:72:7	36.0377	15.1342	32.0948	202.906	143.539	85.9425	82.7674	CL:72:7	340.331	136.766	407.182	409.649	245.372	307.86	116.681	CL:72:7	10.023	243.326
CL:72:8	245.581	129.006	222.518	229.184	241.865	213.631	48.2188	CL:72:8	310.763	240.906	270.934	178.83	250.358	55.611	CL:72:8	129.049	154.075	104.615	123.916	154.639	133.259	21.3067	CL:72:8	87.5106	186.166	166.225	122.143	144.46	141.301	38.4203	CL:72:8	128.913	31.9926	78.0353	267.375	210.851	143.433	95.9341	CL:72:8	527.999	207.639	521.737	549.661	408.749	443.157	142.626	CL:72:8	16.7703	293.802
CL:72:9	189.96	105.616	196.048	178.87	196.07	173.313	38.4893	CL:72:9	176.396	172.796	142.616	75.7573	141.892	46.6188	CL:72:9	36.6703	121.97	14.9277	54.5053	123.283	70.2711	49.8082	CL:72:9	62.2857	132.042	111.294	84.6943	119.978	102.059	28.2346	CL:72:9	45.8667	11.7255	18.3603	185.049	157.501	83.7005	81.5463	CL:72:9	262.059	72.2784	358.673	298.09	248.162	247.853	107.044	CL:72:9	8.96617	93.1415
MIPCdOH:40:0	0.483742	0.285117	0.361482	0.581061	0.463598	0.435	0.114452	MIPCdOH:40:0	0.459891	0.178576	0.432726	0.149303	0.305124	0.163839	MIPCdOH:40:0	5.03836	3.50883	4.55495	7.54085	4.94187	5.11697	1.48442	MIPCdOH:40:0	0.381796	5.45247	0.385792	0.337664	2.79222	1.86999	2.2611	MIPCdOH:40:0	0.127909	0.302725	0.432069	0.270776	0.231939	0.273084	0.110599	MIPCdOH:40:0	1.92978	0.910405	2.94492	1.5039	2.28931	1.91566	0.771246	MIPCdOH:40:0	0.257692	4.4924
MIPCdOH:40:1	1.74967	1.12253	1.41798	2.4831	1.83615	1.72189	0.511093	MIPCdOH:40:1	1.62286	0.648528	1.43794	0.491558	1.05022	0.563234	MIPCdOH:40:1	35.3216	16.9341	41.0576	43.1095	24.1368	32.1119	11.2388	MIPCdOH:40:1	1.2751	20.7984	1.13577	1.02923	8.78366	6.60443	8.59664	MIPCdOH:40:1	0.366122	1.22967	1.73751	1.09978	1.08341	1.1033	0.490417	MIPCdOH:40:1	10.1271	5.54332	13.6481	10.2281	11.9318	10.2957	3.02215	MIPCdOH:40:1	0.847891	21.9077
MIPCdOH:40:2	0.525891	0.702432	0.58305	1.05501	0.615341	0.696345	0.210434	MIPCdOH:40:2	0.555132	0.318761	0.461407	0.169268	0.376142	0.168718	MIPCdOH:40:2	15.3021	7.57786	28.6661	12.9311	9.58011	14.8115	8.2979	MIPCdOH:40:2	0.781479	8.87759	0.593207	0.505442	4.02993	2.95753	3.62406	MIPCdOH:40:2	0.120946	0.491854	0.552123	0.399922	0.39111	0.391191	0.165182	MIPCdOH:40:2	2.42843	1.29663	4.58942	2.13138	3.34743	2.75866	1.25881	MIPCdOH:40:2	0.500739	6.32485
MIPCdOH:42:0	0	0	0	0	0	0	0	MIPCdOH:42:0	0	0	0	0	0	0	MIPCdOH:42:0	0.0715169	0.0611185	0.065632	0.134605	0.100035	0.0865816	0.030828	MIPCdOH:42:0	0	0.0940402	0	0	0.0379694	0.0264019	0.0412308	MIPCdOH:42:0	0	0	0	0	0	0	0	MIPCdOH:42:0	0	0	0	0	0	0	0	MIPCdOH:42:0	0	0.130689
MIPCdOH:42:1	0.0355124	0.0212162	0	0.0511836	0.0303736	0.0276572	0.0189009	MIPCdOH:42:1	0.0653119	0	0.0222172	0	0.0218823	0.0307891	MIPCdOH:42:1	0.837342	0.54562	0.716352	1.57653	0.821786	0.899526	0.395931	MIPCdOH:42:1	0.0429522	0.907063	0.0459037	0.0479902	0.412876	0.291357	0.379157	MIPCdOH:42:1	0	0.108923	0.136735	0	0	0.0491316	0.067991	MIPCdOH:42:1	0.279486	0.187513	0.288543	0.22857	0.222279	0.241278	0.0421511	MIPCdOH:42:1	0.098804	1.38577
MIPCdOH:42:2	0.334789	0.0988594	0.165818	0.368769	0.237314	0.24111	0.112906	MIPCdOH:42:2	0.371724	0.0851487	0.196054	0	0.163232	0.160507	MIPCdOH:42:2	6.58198	2.62046	5.83098	10.7912	4.53058	6.07103	3.03635	MIPCdOH:42:2	0.236803	5.35996	0.196975	0.293521	2.364	1.69025	2.248	MIPCdOH:42:2	0	0.488842	0.663244	0.140172	0.114378	0.281327	0.281009	MIPCdOH:42:2	2.01	1.52294	1.69944	2.22613	1.69897	1.8315	0.281873	MIPCdOH:42:2	0.289571	8.69591
MIPCdOH:42:3	1.44014	0.179467	0.681534	1.13717	0.887268	0.865117	0.476702	MIPCdOH:42:3	1.04728	0.251089	0.670125	0.215562	0.546015	0.392791	MIPCdOH:42:3	22.3387	6.92218	25.9766	31.7878	12.4811	19.9013	10.0952	MIPCdOH:42:3	0.566615	12.3343	0.400266	0.814695	4.90243	3.80366	5.12286	MIPCdOH:42:3	0.213268	1.04461	1.75799	0.737941	0.954054	0.941572	0.558839	MIPCdOH:42:3	7.08746	5.11115	4.96802	7.9641	5.2316	6.07247	1.3656	MIPCdOH:42:3	0.732595	24.2225
MIPCdOH:42:4	1.07333	0.116697	0.945951	0.653623	0.839226	0.725766	0.373607	MIPCdOH:42:4	0.505261	0.0919406	0.301513	0.0948014	0.248379	0.197375	MIPCdOH:42:4	3.72558	3.17998	2.41418	7.95179	4.96612	4.44753	2.16859	MIPCdOH:42:4	0.452833	6.8156	0.233267	0.364063	3.45118	2.26339	2.87838	MIPCdOH:42:4	0.0916744	0.531255	0.499152	0.863146	0.448798	0.486805	0.274469	MIPCdOH:42:4	2.37119	0.883373	2.06491	1.66438	2.15895	1.82856	0.587324	MIPCdOH:42:4	0.366403	4.98105
PC:28:0	0	0	0	0	0	0	0	PC:28:0	0	0	0	0	0	0	PC:28:0	0	39.0102	0	0	0	7.80204	17.4459	PC:28:0	0.0977743	5.14558	14.0664	20.658	0	7.99353	9.10518	PC:28:0	0	0	0	0	0	0	0	PC:28:0	0	0	0	0	0	0	0	PC:28:0	0	0
PC:32:1	69.6327	28.5689	101.373	72.4654	78.9766	70.2033	26.3978	PC:32:1	60.753	62.0419	48.5532	44.1952	53.8858	8.86986	PC:32:1	75.009	81.348	32.2152	242.814	157.737	117.825	83.2285	PC:32:1	23.9902	39.0193	35.5258	44.5365	59.7706	40.5685	13.1066	PC:32:1	18.9098	1.72467	0.475738	28.7431	19.0823	13.7871	12.2542	PC:32:1	227.309	317.607	180.823	341.719	135.95	240.682	87.8303	PC:32:1	0.417642	110.755
PC:32:2	55.1941	46.9963	73.9412	83.9827	70.1042	66.0437	14.8424	PC:32:2	28.9912	51.2224	48.4302	45.4104	43.5135	9.96824	PC:32:2	52.1746	47.6922	18.8919	116.767	60.7441	59.2539	35.7871	PC:32:2	19.9924	47.5731	21.3046	21.8479	33.583	28.8602	11.8044	PC:32:2	32.7537	1.25443	0.275195	56.1975	48.8368	27.8635	26.1523	PC:32:2	159.446	167.917	180.41	190.313	101.585	159.934	34.6795	PC:32:2	0.110771	82.7943
PC:32:3	10.1694	27.044	18.6807	26.8024	15.9729	19.7339	7.24804	PC:32:3	3.82719	23.492	10.9954	13.8068	13.0303	8.14223	PC:32:3	4.32399	9.32304	0.990193	11.8435	13.2406	7.94426	5.16289	PC:32:3	9.91134	15.1712	11.5744	10.3869	14.5711	12.323	2.41305	PC:32:3	6.7335	0.162304	0.033387	12.4192	11.2959	6.12888	5.90313	PC:32:3	15.5438	18.0152	35.83	26.4625	20.997	23.3697	8.068	PC:32:3	0.0119283	17.6173
PC:34:1	437.457	301.112	525.053	593.1	455.654	462.475	109.19	PC:34:1	483.242	443.596	496.723	614.124	509.421	73.3537	PC:34:1	421.743	479.526	256.701	766.425	634.008	511.681	196.211	PC:34:1	231.921	512.158	432.613	504.751	543.478	444.984	125.832	PC:34:1	444.865	51.5021	35.4311	482.338	412.701	285.367	222.268	PC:34:1	915.669	1118.76	1441.9	1094.25	819.338	1077.98	238.542	PC:34:1	11.8906	706.797
PC:34:2	1895.76	1368.15	2013.82	2982.7	2148.39	2081.76	584.079	PC:34:2	1852.52	1802.16	1832.78	1513.11	1750.14	159.374	PC:34:2	2035.59	2045.65	1107.87	3011.76	2349.56	2110.09	686.385	PC:34:2	986.58	1944.94	1528.47	1847.71	1889.96	1639.53	399.375	PC:34:2	1720.94	300.594	199.941	2451.22	1863.45	1307.23	1003.57	PC:34:2	4350.8	4603.2	6993.4	5267.71	3460.78	4935.18	1320.27	PC:34:2	69.1115	2677.76
PC:34:3	604.274	496.982	703.381	803.234	697.936	661.161	115.662	PC:34:3	456.112	553.125	455.299	342.799	451.834	85.9821	PC:34:3	483.189	735.559	192.868	1079.21	1030.74	704.314	373.682	PC:34:3	587.749	729.415	770.117	799.713	932.857	763.97	124.585	PC:34:3	343.154	72.3037	29.2069	554.712	493.965	298.668	239.546	PC:34:3	802.247	1494.08	2621.3	930.974	803.884	1330.5	776.033	PC:34:3	19.2162	385.178
PC:34:4	125.611	84.8325	169.493	155.731	149.168	136.967	33.1884	PC:34:4	80.3172	131.203	137.837	176.285	131.411	39.436	PC:34:4	120.705	82.8454	51.6126	231.397	152.648	127.842	69.3282	PC:34:4	80.5099	159.976	108.552	171.761	144.882	133.136	37.8287	PC:34:4	111.877	3.19711	0.835273	128.87	105.487	70.0531	62.6996	PC:34:4	274.207	245.583	386.756	273.246	218.842	279.727	64.0323	PC:34:4	0.362623	130.266
PC:34:5	12.482	48.029	21.6449	34.5345	21.8036	27.6988	13.8112	PC:34:5	6.98907	32.926	25.4469	19.7536	21.2789	10.9477	PC:34:5	9.74034	13.4427	5.01619	16.6818	13.6142	11.699	4.47306	PC:34:5	15.9096	33.4242	15.3166	18.8367	23.8773	21.4729	7.49022	PC:34:5	11.6041	0.182461	0.0439117	18.5867	16.5125	9.38594	8.83657	PC:34:5	22.6166	28.0668	72.0447	37.8317	45.2887	41.1697	19.3473	PC:34:5	0.0118612	12.0724
PC:36:1	199.956	335.849	342.366	508.744	303.481	338.079	111.159	PC:36:1	134.282	315.206	155.156	225.909	207.638	81.7317	PC:36:1	233.92	421.838	41.9907	432.042	429.349	311.828	172.66	PC:36:1	186.441	304.405	197.652	158.616	257.599	220.943	59.0064	PC:36:1	197.646	12.8598	10.9894	477.631	386.731	217.171	212.853	PC:36:1	704.687	640.09	1199.95	1050.28	829.736	884.948	235.615	PC:36:1	3.71064	602.405
PC:36:2	1113.89	913.278	1289.55	1578.8	1139.48	1207	247.259	PC:36:2	843.222	1104.92	1018.11	1081.57	1011.96	118.32	PC:36:2	808.928	1500.58	409.876	1958.35	1326.81	1200.91	603.895	PC:36:2	674.27	1459.8	1009.4	887.014	1553.15	1116.73	376.903	PC:36:2	831.489	114.24	76.8223	1392.39	1194.18	721.823	606.215	PC:36:2	1971.74	2436.81	3765.07	3061.73	2199.26	2686.92	727.107	PC:36:2	28.2348	1800.86
PC:36:3	3543.45	2286.86	4016.88	5099.13	4047.91	3798.85	1018.78	PC:36:3	3277.78	3701.27	4058.78	3693.71	3682.88	319.302	PC:36:3	2060.59	2407.34	938.002	3637.56	2742.8	2357.26	986.485	PC:36:3	2263.47	3136.16	3333.82	3527.42	3632.36	3178.65	545.647	PC:36:3	3003.56	370.658	221.078	4160.46	3824.48	2316.05	1892.31	PC:36:3	6054.53	6028.07	9619.04	7907.53	6492.52	7220.34	1544.05	PC:36:3	60.3376	4622.14
PC:36:4	4059.33	2946.11	4389.17	6066.14	4825.6	4457.27	1136.96	PC:36:4	3365.19	4462.39	4292.18	3589.37	3927.28	532.173	PC:36:4	3881.81	3016.16	2066.94	4153.25	3898.73	3403.38	862.059	PC:36:4	2559.13	3794.77	3587.61	4227.44	4813.98	3796.59	836.016	PC:36:4	3827.75	447.408	330.46	5248.13	4778.75	2926.5	2372.68	PC:36:4	7377.04	8187.11	12835.6	9054.02	8209.22	9132.6	2153.31	PC:36:4	138.427	4913.12
PC:36:5	162.854	1154.42	516.58	1588.18	1234.33	931.273	577.842	PC:36:5	628.018	324.069	327.77	1071.13	587.746	352.322	PC:36:5	682.897	1313.31	352.623	1510.93	1229.45	1017.84	482.162	PC:36:5	1465.24	2292.5	2024.59	2137.85	2419.75	2067.99	368.854	PC:36:5	764.931	185.131	60.556	974.714	965.894	590.245	437.073	PC:36:5	501.041	2079.26	4591.69	523.25	1589.68	1856.98	1674.58	PC:36:5	38.876	984.538
PC:36:6	329.284	534.38	451.366	611.886	462.336	477.85	105.09	PC:36:6	305.437	584.365	391.642	467.038	437.121	118.3	PC:36:6	166.002	302.321	37.536	246.885	332.496	217.048	118.659	PC:36:6	478.588	549.226	608.415	461.781	617.71	543.144	71.8418	PC:36:6	318.676	29.454	7.16734	381.805	386.652	224.751	190.515	PC:36:6	475.916	373.285	1194.93	495.723	603.707	628.713	326.92	PC:36:6	9.80706	331.492
PC:38:2	52.7204	49.5354	68.6425	89.0878	57.9521	63.5877	15.9932	PC:38:2	37.6073	58.8323	54.5134	40.0271	47.745	10.5052	PC:38:2	27.9787	40.1274	7.62101	71.0821	45.9066	38.5431	23.3629	PC:38:2	28.5857	66.9122	29.6462	38.3951	70.9232	46.8925	20.5124	PC:38:2	27.5541	1.6361	0.389185	62.5766	53.8658	29.2044	28.7878	PC:38:2	66.3089	79.8943	112.631	121.257	88.5695	93.7321	22.8307	PC:38:2	0.304852	79.3314
PC:38:3	436.654	312.233	512.712	607.869	459.559	465.805	108.231	PC:38:3	244.29	365.173	455.245	272.673	334.345	95.709	PC:38:3	115.399	139.056	43.4631	289.2	180.726	153.569	90.725	PC:38:3	148.446	385.415	180.968	323.12	368.123	281.215	109.366	PC:38:3	218.418	6.92156	4.61402	433.77	423.352	217.415	211.431	PC:38:3	395.487	317.314	538.398	481.508	458.848	438.311	84.8223	PC:38:3	1.21663	260.029
PC:38:4	322.776	350.185	423.259	528.673	396.091	404.197	79.7965	PC:38:4	198.447	358.532	415.232	292.937	316.287	93.106	PC:38:4	125.176	252.146	47.2621	305.997	164.895	179.095	102.384	PC:38:4	155.025	458.451	239.691	305.481	370.176	305.765	116.78	PC:38:4	200.997	20.8974	7.32713	379.921	386.279	199.084	184.573	PC:38:4	382.147	375.577	640.521	482.477	485.245	473.193	107.294	PC:38:4	0	232.069
PC:38:5	228.018	410.78	368.927	513.983	352.001	374.742	103.399	PC:38:5	151.247	402.239	345.398	282.715	295.4	107.789	PC:38:5	49.3725	112.392	15.004	117.987	119.54	82.8592	47.8992	PC:38:5	191.234	366.392	229.483	284.08	354.63	285.164	76.4002	PC:38:5	164.029	3.87073	1.48145	315.161	323.031	161.515	158.243	PC:38:5	223.677	170.048	477.97	288.764	351.864	302.465	119.553	PC:38:5	0.635914	112.272
PC:38:6	41.5783	171.221	75.7831	133.858	60.2992	96.548	54.1639	PC:38:6	11.173	117.954	45.266	67.8871	60.57	44.7985	PC:38:6	5.58062	23.5644	5.183	7.87832	26.9228	13.8258	10.5407	PC:38:6	76.6666	95.6327	84.3174	74.9165	105.515	87.4097	13.0047	PC:38:6	20.3803	0.522452	0.0947793	46.0948	49.1536	23.2492	23.7372	PC:38:6	10.9761	12.5468	109.789	18.0515	42.4676	38.7663	41.6739	PC:38:6	0.0649361	8.57491
PE:28:0	0	0	0	0	0	0	0	PE:28:0	0	0.823504	0	0	0.205876	0.411752	PE:28:0	0.42909	0	0.225761	0	0	0.13097	0.19321	PE:28:0	0	0	0	0	0	0	0	PE:28:0	0	0	0	0	0	0	0	PE:28:0	0	0	8.85129	0	0	1.77026	3.95842	PE:28:0	0	0
PE:32:0	56.5317	15.4431	51.0256	70.5458	47.1423	48.1377	20.3153	PE:32:0	166.49	57.0251	48.0712	54.7711	81.5893	56.7279	PE:32:0	37.0702	70.1668	34.8766	87.2231	134.839	72.8351	41.1661	PE:32:0	44.5155	95.173	101.378	131.556	131.982	100.921	35.7705	PE:32:0	51.8988	21.6059	13.9734	42.9418	39.5201	33.988	15.6961	PE:32:0	65.5691	168.652	179.944	72.3596	59.8793	109.281	59.6504	PE:32:0	26.6868	74.919
PE:32:1	400.104	105.043	574.363	523.818	465.189	413.704	184.421	PE:32:1	1018.18	362.047	327.432	127.549	458.802	386.975	PE:32:1	293.188	455.738	169.353	749.915	819.089	497.457	282.09	PE:32:1	235.608	454.209	520.998	937.648	501.293	529.951	254.702	PE:32:1	459.851	124.533	78.1829	531.334	425.979	323.976	207.398	PE:32:1	826.459	1336.42	1791.09	1237.64	343.863	1107.09	547.438	PE:32:1	198.79	562.687
PE:32:2	18.8973	28.6333	38.4114	42.3299	41.1504	33.8844	9.95995	PE:32:2	55.6427	36.5524	12.9744	14.5756	29.9363	20.234	PE:32:2	11.8749	42.8813	5.79595	28.4267	81.8819	34.1722	30.3622	PE:32:2	35.6146	36.3468	84.5849	64.0937	54.6925	55.0665	20.5047	PE:32:2	20.322	11.7004	5.38783	27.9438	31.3572	19.3423	10.8677	PE:32:2	40.2251	52.8181	140.02	42.4781	49.7209	65.0524	42.2221	PE:32:2	30.0253	18.3539
PE:32:3	1.0734	0.523374	2.19078	1.99829	2.49948	1.65707	0.827175	PE:32:3	5.71691	1.88126	2.13564	2.57788	3.07792	1.78271	PE:32:3	1.23115	2.84366	0.730395	4.24266	4.61126	2.73182	1.73818	PE:32:3	1.43899	1.76596	4.3002	4.6276	2.10966	2.84848	1.49809	PE:32:3	2.11147	0.199622	0.260571	2.07532	2.08975	1.34735	1.02021	PE:32:3	6.94862	5.83564	0	5.17596	4.54957	4.50196	2.66876	PE:32:3	0.41661	2.74489
PE:34:1	108.315	75.0398	132.897	147.127	112.826	115.241	27.3789	PE:34:1	148.314	120.997	86.0428	83.5761	109.733	30.8805	PE:34:1	58.8128	192.907	26.7414	143.79	182.508	120.952	74.5405	PE:34:1	109.575	202.252	151.433	92.9777	200.669	151.381	50.4377	PE:34:1	73.7058	25.1447	13.9902	68.7732	118.614	60.0456	41.9293	PE:34:1	129.967	229.061	372.595	280.231	206.253	243.621	90.1388	PE:34:1	27.686	156.608
PE:34:2	316.533	404.366	629.967	719.576	503.476	514.784	163.424	PE:34:2	467.037	424.475	428.84	460.093	445.111	21.5701	PE:34:2	361.173	770.217	92.1584	774.145	845.945	568.728	327.811	PE:34:2	532.684	970.941	842.468	554.048	688.053	717.639	188.142	PE:34:2	415.513	84.4272	23.2158	689.37	692.104	380.926	319.779	PE:34:2	824.718	1289.72	2419.71	1457.9	1195.29	1437.47	596.063	PE:34:2	110.175	617.137
PE:34:3	159.02	147.342	192.962	217.851	185.906	180.616	28.0195	PE:34:3	446.123	192.997	110.043	75.7869	206.237	167.323	PE:34:3	114.129	297.44	87.9079	219.292	310.449	205.844	102.266	PE:34:3	217.1	243.807	418.065	216.975	235.247	266.239	85.6688	PE:34:3	133.62	81.0026	43.7357	186.906	170.907	123.234	60.2873	PE:34:3	315.966	419.071	756.949	324.086	295.181	422.251	193.075	PE:34:3	159.535	157.187
PE:34:4	37.5461	8.43202	58.0221	53.5111	57.1875	42.9398	20.9887	PE:34:4	115.118	27.2678	29.1064	36.9872	52.12	42.2101	PE:34:4	19.4866	57.5714	10.258	39.5843	84.8586	42.3518	29.9956	PE:34:4	37.4915	42.2583	99.9882	85.1627	54.2265	63.8255	27.449	PE:34:4	49.6767	28.328	21.5584	55.0376	56.9868	42.3175	16.2619	PE:34:4	81.3674	77.9431	141.149	84.7744	64.7083	89.9884	29.5934	PE:34:4	45.8588	36.2852
PE:36:2	60.9548	76.6246	97.3037	111.882	84.8118	86.3153	19.4533	PE:36:2	55.8177	108.422	81.1397	68.9933	78.5932	22.4138	PE:36:2	41.7316	135.699	9.10504	106.426	105.795	79.7514	52.3364	PE:36:2	87.335	153.387	77.2789	39.4452	135.104	98.5101	45.8664	PE:36:2	51.5267	1.60678	0.958753	112.533	97.5486	52.8348	52.1545	PE:36:2	80.8354	134.73	246.618	251.954	158.432	174.514	73.8463	PE:36:2	1.93345	118.269
PE:36:3	120.605	79.3979	185.839	190.198	150.564	145.321	46.4755	PE:36:3	90.3186	183.634	161.345	182.974	154.568	44.0667	PE:36:3	74.1163	205.368	14.0053	161.487	159.384	122.872	77.2316	PE:36:3	141.946	217.428	186.302	89.9516	201.311	167.388	51.6143	PE:36:3	140.538	20.9643	21.2455	248.06	179.005	121.962	99.8047	PE:36:3	253.015	361.275	633.694	445.353	359.109	410.489	142.211	PE:36:3	4.09392	156.448
PE:36:4	143.685	107.907	316.489	253.934	214.09	207.221	83.7691	PE:36:4	91.0643	207.792	148.945	159.03	151.708	47.9038	PE:36:4	136.952	293.021	43.5895	296.405	240.398	202.073	109.541	PE:36:4	176.089	304.895	201.311	103.997	176.81	192.621	72.5577	PE:36:4	203.669	4.54656	0.696675	337.911	268.745	163.114	154.013	PE:36:4	261.976	389.214	852.42	510.728	465.6	495.987	220.424	PE:36:4	0	246.449
PE:36:5	26.3172	57.5647	71.1448	73.9517	58.4452	57.4847	18.9084	PE:36:5	15.8793	97.7169	44.2818	73.2561	57.7835	35.4605	PE:36:5	15.2458	109.146	2.91589	35.8206	62.2316	45.0719	42.2854	PE:36:5	76.9278	88.0436	85.8427	33.6518	73.8413	71.6614	22.0607	PE:36:5	43.8684	1.22845	0.0373025	89.3082	85.6699	44.0225	43.4493	PE:36:5	45.7927	41.4632	264.711	96.5018	133.06	116.306	91.2009	PE:36:5	1.60047	38.2577
PE:36:6	3.03205	13.0372	10.6925	16.6466	9.87422	10.6565	5.00736	PE:36:6	1.84046	21.858	7.52714	19.2813	12.6267	9.51926	PE:36:6	0	14.5318	3.96685	2.84402	8.5526	5.97904	5.68767	PE:36:6	30.5488	14.5159	29.3118	11.5913	14.4202	20.0776	9.08123	PE:36:6	7.63158	0.0358504	0	13.81	14.5012	7.19572	7.07726	PE:36:6	3.17476	6.24381	46.9759	8.90871	24.6946	17.9995	18.2007	PE:36:6	0.0455319	4.2287
PI:34:1	9.34487	4.55591	8.32358	11.9781	7.49233	8.33896	2.70572	PI:34:1	11.2307	11.769	8.78263	7.75457	9.88423	1.92478	PI:34:1	1.40316	7.53325	0.108829	6.60015	7.8192	4.69292	3.65086	PI:34:1	9.69204	17.1059	14.0606	7.18295	20.8044	13.7692	5.49352	PI:34:1	3.84422	2.02151	2.24026	6.45242	7.24869	4.36142	2.39534	PI:34:1	3.28521	2.45814	19.7465	5.63737	9.24184	8.0738	7.03594	PI:34:1	1.71832	4.22564
PI:34:2	67.3803	28.7675	73.5159	90.8988	70.9181	66.2961	22.8492	PI:34:2	75.8446	49.8884	61.0383	53.3231	60.0236	11.5319	PI:34:2	22.5379	36.2496	5.03579	64.6048	47.0717	35.1	22.7862	PI:34:2	26.6504	48.909	48.9889	44.9654	47.8423	43.4712	9.54324	PI:34:2	41.5996	18.3721	24.8599	73.3291	76.6282	46.9578	26.9719	PI:34:2	54.5352	33.6574	128.593	69.0832	81.6624	73.5064	35.5968	PI:34:2	10.3761	31.0245
PI:34:3	6.65255	10.7942	11.8962	17.4795	9.51146	11.2668	3.98716	PI:34:3	9.48083	13.8362	7.1086	8.49538	9.73024	2.9051	PI:34:3	1.1058	5.30166	0.128685	6.51147	7.93254	4.19603	3.4146	PI:34:3	7.43407	11.5019	13.0505	7.93318	11.6875	10.3214	2.48736	PI:34:3	3.0026	2.23912	2.039	7.94648	10.6148	5.1684	3.88733	PI:34:3	2.50282	2.70676	18.7858	4.68225	8.90294	7.51612	6.80484	PI:34:3	1.93104	5.18265
PI:36:4	3.08442	2.07263	3.29493	4.65638	2.66989	3.15565	0.959889	PI:36:4	3.62383	3.45609	3.8199	2.73295	3.40819	0.474076	PI:36:4	1.93463	3.6956	0.256933	6.19507	4.04885	3.22622	2.247	PI:36:4	2.11455	6.08861	3.63468	2.97703	4.6539	3.89375	1.53853	PI:36:4	1.23753	0.700082	0.780099	2.59378	2.94824	1.65194	1.04944	PI:36:4	2.21615	2.00866	7.29467	4.02044	3.79183	3.86635	2.11877	PI:36:4	0.703371	4.26371
PI:36:5	1.53373	3.61337	2.5315	4.87142	2.49438	3.00888	1.27506	PI:36:5	2.90441	4.47932	3.73568	3.39458	3.6285	0.661919	PI:36:5	0.834403	2.80772	0.125932	1.60823	2.19951	1.51516	1.06549	PI:36:5	2.47602	4.45795	2.78007	2.87751	4.24767	3.36784	0.914289	PI:36:5	1.24475	0.861629	0.763111	2.04028	2.44867	1.47169	0.742218	PI:36:5	1.33665	1.41864	6.51458	2.40989	3.25277	2.98651	2.12314	PI:36:5	0.82367	1.43852
Cer:36:1	2.38534	5.76321	2.43357	4.64301	3.36611	3.71825	1.46527	Cer:36:1	3.18251	4.89015	3.19627	4.46147	3.9326	0.875865	Cer:36:1	0	0	0	0	0	0	0	Cer:36:1	5.0582	8.27949	7.50982	6.9966	9.75124	7.51907	1.72408	Cer:36:1	4.43114	2.7118	1.79761	5.3433	4.84361	3.82549	1.50497	Cer:36:1	88.8383	239.405	172.363	184.623	80.8204	153.21	67.3928	Cer:36:1	0.957718	7.79887
Cer:36:2	2.31394	5.9448	3.50526	4.67099	3.13349	3.9137	1.41718	Cer:36:2	3.03847	5.87128	4.87713	5.0735	4.71509	1.19757	Cer:36:2	0	0	0	0	0	0	0	Cer:36:2	7.31243	20.5029	7.04408	12.3751	13.1083	12.0686	5.48132	Cer:36:2	3.0569	2.28968	1.83308	5.74255	6.35948	3.85634	2.0622	Cer:36:2	0.695612	129.432	79.3659	0	2.0948	42.3177	59.3772	Cer:36:2	0	0
CerOH:36:3	26.1365	16.0452	31.7191	30.5837	24.7247	25.8418	6.21163	CerOH:36:3	36.3571	23.6616	26.4692	20.04	26.632	6.99717	CerOH:36:3	0	0	0	0	0	0	0	CerOH:36:3	43.4042	65.9066	62.9114	62.6197	91.5558	65.2796	17.1905	CerOH:36:3	182.308	92.3285	102.427	285.585	242.979	181.126	84.8786	CerOH:36:3	0	0	0	0	0	0	0	CerOH:36:3	0	0
CerOH:36:1	1.61095	6.20683	4.17699	4.44583	3.16973	3.92207	1.69313	CerOH:36:1	3.46002	3.2281	5.48757	4.46697	4.16066	1.03522	CerOH:36:1	0	0	0	0	0	0	0	CerOH:36:1	6.48504	11.6474	7.85959	5.51267	12.2976	8.76046	3.05708	CerOH:36:1	0	0	2.07279	7.36122	7.54087	3.39498	3.79866	CerOH:36:1	265.327	332.799	198.002	364.864	247.755	281.75	66.9946	CerOH:36:1	0	0
CerOH:37:2	180.618	77.0633	189.668	195.469	167.814	162.127	48.6835	CerOH:37:2	198.98	128.663	126.319	78.8573	133.205	49.4911	CerOH:37:2	0	7.71713	4.93478	12.0245	8.86136	6.70756	4.52941	CerOH:37:2	31.3168	95.7754	48.1233	101.2	93.878	74.0588	32.018	CerOH:37:2	32.4432	9.73395	19.1646	54.0034	56.9144	34.4519	20.8299	CerOH:37:2	0	9.0598	18.1573	0	11.2743	7.69828	7.78718	CerOH:37:2	0	0
CerOH:37:3	129.326	101.906	177.959	168.343	107.184	136.944	34.783	CerOH:37:3	211.006	123.68	132.572	101.187	142.112	47.7913	CerOH:37:3	0	11.1659	0	0	13.552	4.94358	6.82164	CerOH:37:3	3.01352	18.2154	1.36692	39.1238	1.30851	12.6056	16.4364	CerOH:37:3	23.6712	12.5789	30.4448	30.981	30.5143	25.638	7.90316	CerOH:37:3	0	10.3293	14.0497	18.6965	51.4912	18.9133	19.4706	CerOH:37:3	0	0
CertOH:40:0	7.46562	9.80525	10.7454	12.4952	9.13162	9.92861	1.8689	CertOH:40:0	11.8238	10.0271	12.4279	9.14421	10.8557	1.53022	CertOH:40:0	5.75797	2.62663	4.26344	5.82719	2.17095	4.12924	1.70635	CertOH:40:0	3.35242	5.59045	2.94947	5.66221	7.77349	5.06561	1.96068	CertOH:40:0	6.29378	1.55305	1.74671	7.68846	7.07625	4.87165	2.9831	CertOH:40:0	3.70832	5.30965	5.27768	5.94586	4.52959	4.95422	0.858324	CertOH:40:0	1.04448	8.81305
CertOH:41:0	3.48037	2.58584	4.24585	4.19229	3.44988	3.59085	0.676917	CertOH:41:0	5.06467	3.14075	4.11267	3.41118	3.93232	0.858855	CertOH:41:0	3.88283	1.35614	3.64266	3.3842	1.37485	2.72814	1.25637	CertOH:41:0	0.569349	0.897526	0.423793	0.844238	1.12742	0.772465	0.278214	CertOH:41:0	2.84934	0.877743	1.04222	3.28772	2.99583	2.21057	1.15395	CertOH:41:0	3.7995	3.29579	4.18421	4.16124	3.77285	3.84272	0.361923	CertOH:41:0	0.474377	4.23537
CertOH:42:0	16.1533	22.8895	23.3555	25.5089	17.3203	21.0455	4.07642	CertOH:42:0	23.7348	18.3669	21.2778	19.8254	20.8012	2.28844	CertOH:42:0	20.2576	6.71128	17.367	12.6896	6.49722	12.7045	6.18946	CertOH:42:0	13.2976	14.941	6.81698	13.9683	17.7821	13.3612	4.03857	CertOH:42:0	18.8069	7.57387	7.85658	20.9693	18.228	14.6869	6.44651	CertOH:42:0	34.0757	31.1541	38.9974	36.6671	38.2741	35.8337	3.22677	CertOH:42:0	7.96272	30.8033
DH-Cer:36:0	0	0	0	0	0	0	0	DH-Cer:36:0	0	0	0	0	0	0	DH-Cer:36:0	0	0	0	0	0	0	0	DH-Cer:36:0	1.73265	3.02298	3.14455	1.95818	1.87953	2.34758	0.678263	DH-Cer:36:0	0	0	0	0	0	0	0	DH-Cer:36:0	0	1.5841	6.12188	0	0	1.5412	2.65096	DH-Cer:36:0	2.82889	14.7193
GlcCerOH:36:3	77.3897	48.3583	93.2423	92.1022	74.3904	77.0966	18.1601	GlcCerOH:36:3	110.026	72.559	81.7194	64.1866	82.1228	19.9326	GlcCerOH:36:3	0	0	0	0	0	0	0	GlcCerOH:36:3	0	0	0	0	0	0	0	GlcCerOH:36:3	487.375	255.116	278.186	736.826	630.009	477.502	212.007	GlcCerOH:36:3	0	0	0	0	0	0	0	GlcCerOH:36:3	0	0
GlcCerOH:36:1	0	0	0	0	0	0	0	GlcCerOH:36:1	0	3.18044	3.14212	2.84451	2.29177	1.53521	GlcCerOH:36:1	0	0	0	0	0	0	0	GlcCerOH:36:1	0	0	0	0	0	0	0	GlcCerOH:36:1	0	0	0	0	0	0	0	GlcCerOH:36:1	88.8246	0	0	105.75	102.614	59.4376	54.6312	GlcCerOH:36:1	0	0
GlcCerOH:37:2	467	208.054	491.83	516.842	441.45	425.035	124.5	GlcCerOH:37:2	534.492	350.368	349.504	229.436	365.95	125.905	GlcCerOH:37:2	0	24.7918	16.3548	37.081	28.0429	21.2541	14.0074	GlcCerOH:37:2	0	39.5746	0	21.72	33.1439	18.8877	18.3895	GlcCerOH:37:2	97.8953	31.4931	58.5427	156.596	163.384	101.582	58.3618	GlcCerOH:37:2	0	29.9279	59.8903	0	37.8388	25.5314	25.7635	GlcCerOH:37:2	0	0
GlcCerOH:37:3	297.21	215.433	391.33	374.675	290.783	313.886	71.0592	GlcCerOH:37:3	503.527	276.12	308.015	254.258	335.48	114.185	GlcCerOH:37:3	0	0	0	0	0	0	0	GlcCerOH:37:3	0	44.9002	0	78.2447	0	24.629	35.7258	GlcCerOH:37:3	44.3268	39.9723	87.1484	52.9222	53.1053	55.495	18.5739	GlcCerOH:37:3	0	0	0	0	155.353	31.0705	69.4758	GlcCerOH:37:3	0	0
[truncated: 6 more columns]
